# Supplementary material for: Mitogen-Activated Protein Kinase (MAPK) and Obesity-Related Cancer
Source: MDPI journal article supplement (doi:10.3390/ijms21041241), 2020-02-13
Supplement: s1 [file s1]

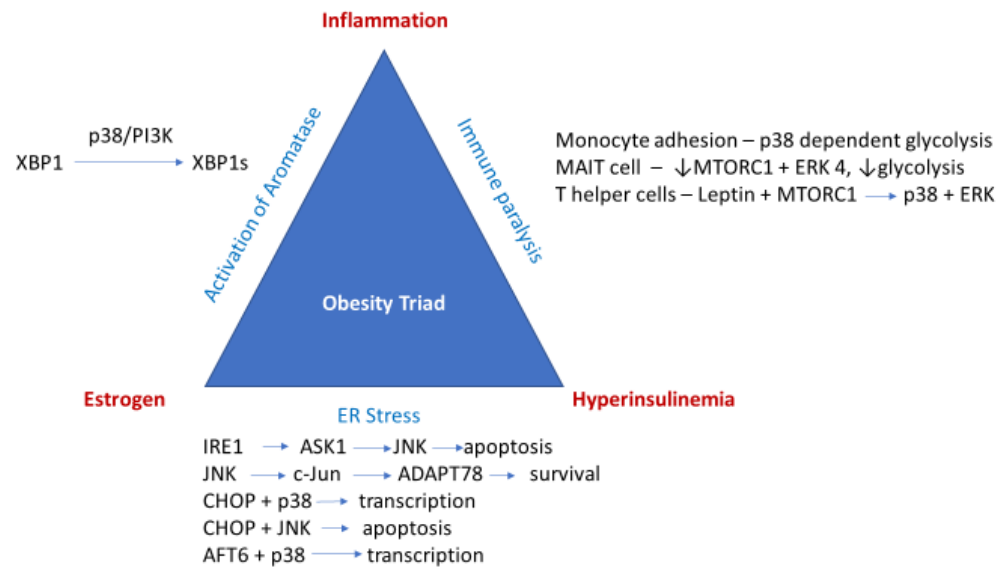

**Figure S1.** Interaction between Obesity triad and MAPK signalling. Obesity is associated with the triad of inflammation, hyperinsulinemia and increased oestrogen signalling, with associated outcomes including increased aromatisation, ER stress and immune paralysis. There is increasing evidence to support different types of MAPK signalling in many of these processes.
